# Supplementary material
Source: PubMed Central journal article supplement (PMC4229365)
Supplement: supp_217.22.3996_JEB110510.pdf [file supp_217.22.3996_JEB110510.pdf]

Table S1. Results of mixed-model analyses (from the MIXED procedure in SAS, with "Satterthwaite" option). For fixed effects, F-statistics, denominator degrees of freedom, and probabilities are given (numerator df is always 1). For random effects, restricted maximum-likelihood estimates of variance components are given. Data in Figures 2 and 3 are reported without analysis, due to the lack of overlap of line means.

| Trait                  | Figure | Effect     | Fixed Effects |        |                   | Random Effects |        |
|------------------------|--------|------------|---------------|--------|-------------------|----------------|--------|
|                        |        |            | F             | den df | Prob              | Variance       | SE     |
| Ethanol concentration  | 4A     | Region     | 67.2          | 11.2   | <b>&lt;0.0001</b> |                |        |
|                        |        | Sex        | 2.62          | 2.13   | 0.24              |                |        |
|                        |        | R x S      | 8.85          | 11.2   | <b>0.01</b>       |                |        |
|                        |        | Assay date |               |        |                   | 0              |        |
|                        |        | R x A      |               |        |                   | 0              |        |
|                        |        | S x A      |               |        |                   | 0.011          | 0.012  |
|                        |        | R x S x A  |               |        |                   | 0              |        |
|                        |        | Within     |               |        |                   | 0.0083         | 0.0035 |
| Ethanol concentration  | 4B     | Region     | 16.92         | 12     | <b>0.0014</b>     |                |        |
|                        |        | Sex        | 4.26          | 12     | 0.06              |                |        |
|                        |        | R x S      | 1.33          | 12     | 0.27              |                |        |
|                        |        | Within     |               |        |                   | 0.028          | 0.012  |
| Ethanol resistance     | 5A     | Region     | 21.82         | 4.07   | <b>0.009</b>      |                |        |
|                        |        | Sex        | 2.00          | 2.83   | 0.26              |                |        |
|                        |        | R x S      | 0.13          | 2.83   | 0.75              |                |        |
|                        |        | Line(R)    |               |        |                   | 0.029          | 0.026  |
|                        |        | S x L(R)   |               |        |                   | 0.001          | 0.013  |
|                        |        | Within     |               |        |                   | 0.051          | 0.013  |
| Ethanol resistance     | 5B     | Region     | 196.7         | 32     | <b>&lt;0.0001</b> |                |        |
|                        |        | Sex        | 1.07          | 32     | 0.31              |                |        |
|                        |        | R x S      | 14.87         | 32     | <b>0.0005</b>     |                |        |
|                        |        | Within     |               |        |                   | 0.033          | 0.008  |
| Ethanol concentration  | 6A     | Region     | 0.14          | 6      | 0.72              |                |        |
|                        |        | Sex        | 12.29         | 6      | <b>0.01</b>       |                |        |
|                        |        | R x S      | 0.03          | 6      | 0.88              |                |        |
|                        |        | Line(R)    |               |        |                   | 0              |        |
|                        |        | S x L(R)   |               |        |                   | 0.004          | 0.006  |
|                        |        | Within     |               |        |                   | 0.021          | 0.006  |
| Ethanol concentration  | 6B     | Region     | 0.67          | 20     | 0.42              |                |        |
|                        |        | Sex        | 3.22          | 20     | 0.09              |                |        |
|                        |        | R x S      | 6.83          | 20     | <b>0.02</b>       |                |        |
|                        |        | Within     |               |        |                   | 0.038          | 0.012  |
| Acetic acid resistance | 7A     | Region     | 38.5          | 20     | <b>&lt;0.0001</b> |                |        |
|                        |        | Sex        | 2.06          | 20     | 0.17              |                |        |
|                        |        | R x S      | 0.03          | 20     | 0.87              |                |        |
|                        |        | Line(R)    |               |        |                   | 0              |        |
|                        |        | S x L(R)   |               |        |                   | 0              |        |
|                        |        | Within     |               |        |                   | 0.13           | 0.04   |

|                        |    |                   |      |    |                   |       |        |       |
|------------------------|----|-------------------|------|----|-------------------|-------|--------|-------|
| Acetic acid resistance | 7B | <u>Region</u>     | 72.7 | 20 | <b>&lt;0.0001</b> |       |        |       |
|                        |    | <u>Sex</u>        | 0.00 | 20 | 0.95              |       |        |       |
|                        |    | R x S             | 9.51 | 20 | <b>0.006</b>      |       |        |       |
|                        |    | Within            |      |    |                   | 0.045 | 0.014  |       |
| Acetic acid, Adh null  | 8A | <u>Region</u>     |      | 20 | <b>&lt;0.0001</b> |       |        |       |
|                        |    | <u>Sex</u>        |      | 20 | <b>0.04</b>       |       |        |       |
|                        |    | R x S             |      | 20 | 0.09              |       |        |       |
|                        |    | <u>Assay date</u> |      |    |                   |       | 0      |       |
|                        |    | R x A             |      |    |                   |       | 0      |       |
|                        |    | S x A             |      |    |                   |       | 0      |       |
|                        |    | R x S x A         |      |    |                   |       | 0      |       |
| Within                 |    |                   |      |    | 0.058             | 0.018 |        |       |
| Ethanol, Adh null      | 8B | <u>Region</u>     | 0.00 | 19 | 0.96              |       |        |       |
|                        |    | <u>Sex</u>        | 9.87 | 19 | <b>0.005</b>      |       |        |       |
|                        |    | R x S             | 0.06 | 19 | 0.81              |       |        |       |
|                        |    | <u>Assay date</u> |      |    |                   |       | 0.0005 | 0.007 |
|                        |    | R x A             |      |    |                   |       | 0      |       |
|                        |    | S x A             |      |    |                   |       | 0      |       |
|                        |    | R x S x A         |      |    |                   |       | 0      |       |
| Within                 |    |                   |      |    | 0.051             | 0.016 |        |       |
